1 **TGF $\beta$ 1-induced cell motility is mediated through Cten in colorectal cancer**

2 Abdulaziz Asiri<sup>a,b</sup>, Teresa Pereira Raposo<sup>a,b,#</sup>, Abdulaziz Alfahed<sup>a,b</sup>, Mohammad Ilyas<sup>a,b</sup>

3

4 <sup>a</sup>Division of Cancer and Stem Cell, Queen's Medical Centre, School of Medicine, University of  
5 Nottingham, Nottingham, UK.

6 <sup>b</sup>Nottingham Molecular Pathology Node, Queen's Medical Centre, University of Nottingham,  
7 Nottingham, UK.

8

9 Running Title: TGF $\beta$ 1 signals through Cten

10

11 #Correspondence addressed to:

12 Dr Teresa Pereira Raposo

13 Division of Cancer and Stem Cells, University of Nottingham, Nottingham NG72UH, UK

14 Tel +44 (0)115 8231131

15 Email [msztp2@nottingham.ac.uk](mailto:msztp2@nottingham.ac.uk)

16

17 Word count: material and methods: 1332; Introduction, results, discussion and figure legends:

18 3399;

19 **Keywords:** epithelial-mesenchymal transition (EMT), colorectal cancer, transforming growth

20 factor beta (TGF- $\beta$ ), cell motility, cell invasion

21

22

## 23 **ABSTRACT**

24 Cten is a tensin which promotes epithelial-mesenchymal transition (EMT) and cell motility. The  
25 precise mechanisms regulating Cten are unknown, although Cten could be regulated by several cytokines  
26 and growth factors. Since Transforming growth factor beta 1 (TGF- $\beta$ 1) regulates integrin function and  
27 promotes EMT / cell motility, we investigated whether this happens through Cten signalling in colorectal  
28 cancer (CRC).

29 TGF- $\beta$ 1 signalling was modulated by either stimulation or knockdown in the CRC cell lines SW620  
30 and HCT116. The effect of this modulation on expression of Cten, EMT markers and cellular function was  
31 tested. Cten role as a direct mediator of TGF- $\beta$ 1 signalling was investigated in a CRC cell line with a deleted  
32 Cten gene (SW620 $\Delta$ Cten).

33 When TGF- $\beta$ 1 was stimulated or inhibited, this resulted in, respectively, upregulation and  
34 downregulation of Cten expression and EMT markers. Cell migration and invasion were significantly  
35 increased following TGF- $\beta$ 1 stimulation and lost by TGF- $\beta$ 1 knockdown. TGF- $\beta$ 1 stimulation in  
36 SW620 $\Delta$ Cten resulted in selective loss of the effect of TGF- $\beta$ 1 signalling on EMT and cell motility whilst the  
37 stimulatory effect on cell proliferation was retained.

38 These data suggested Cten may play an essential role in mediating TGF- $\beta$ 1-induced EMT and cell  
39 motility and may play a role in metastasis in CRC.

40

## 41 **INTRODUCTION**

42 C-terminal tensin-like (Cten, also known as tensin4) is the member of the tensin gene family which  
43 comprises four members (tensin1, tensin2, tensin3, and Cten/tensin4). This protein family localises to the  
44 cytoplasmic tails of integrins at focal adhesion sites. Cten shares high sequence homology to the C-terminus  
45 of the other tensins with a common Src homology 2 (SH2) domain and phosphotyrosine binding (PTB)  
46 domain. Unlike the other tensin protein members (tensins 1-3), Cten lacks the actin binding domain (ABD)

47 which results in an inability to bind to the actin cytoskeleton and is thought to play a critical role in cellular  
48 processes such as cell motility (1).

49  
50 Cten is a putative biomarker in many cancers, acting as oncogene in most tumour types including  
51 the colon, breast, pancreas and melanoma, and it is particularly associated with metastatic disease (2). Cten  
52 expression is possibly upregulated through the activation of upstream signalling pathways since so far, no  
53 mutations or amplification of Cten in cancers have been documented. A study by Katz et al. showed that  
54 stimulation with EGF led to upregulated Cten expression at a post-transcriptional level only in breast cell  
55 lines, whereas others have shown that Cten is upregulated by the EGFR at both the transcriptional and post-  
56 transcriptional level (3, 4). Further reports suggested that Cten is regulated by KRAS in both CRC and  
57 pancreatic cancer cells (5). Cten expression was also shown to be negatively regulated by STAT3 in CRC  
58 cell lines, whereas others have found that Cten is upregulated by STAT3 in human lung cancer cells (6, 7).  
59 How Cten is activated and regulated in these tumours is unclear, nonetheless, multiple pathways seem to  
60 be involved, and it appears to be largely dependent on tissue type or context.

61 Transforming growth factor beta 1 (TGF- $\beta$ 1) is a polypeptide member of the growth factor family  
62 that plays a physiological role in the regulation of wound healing, angiogenesis, differentiation, and  
63 proliferation. TGF- $\beta$  1 can function as a tumour suppressor in normal epithelial cells and in the early stage  
64 of cancer. However, the growth inhibitory function of TGF- $\beta$ 1 is selectively lost in late stage cancer which  
65 results in an induction of cell migration, invasion and metastasis (8, 9). Previous studies have shown that  
66 TGF- $\beta$ 1 is involved in the regulation of EMT processes through numerous downstream pathways, including  
67 Ras/MAPK (10), RhoA (11), and Jagged 1/Notch (12). TGF $\beta$ 1 has also been found to signal through FAK  
68 to upregulate EMT related mesenchymal and invasiveness markers and delocalise E-cadherin membrane  
69 (13). TGF- $\beta$ 1 has been shown to regulate several integrins including  $\alpha$ V,  $\beta$ 1, and  $\beta$ 3 in glioblastoma,  
70 fibroblast, and kidney epithelial cells (14). Others have suggested that the positive regulation of integrin of  
71  $\alpha$ V,  $\alpha$ 6,  $\beta$ 1, and  $\beta$ 4 by TGF- $\beta$ 1 signalling is probably mediated via the activation of the TGF- $\beta$ 1/TGF-

72  $\beta$ RI/Smad2 signalling pathway (15). Furthermore, the TGF- $\beta$ 1 mediated Smad signalling pathway has been  
73 shown to play an important role in EMT associated with metastatic progression (10).

74 There are therefore several cellular functions and processes which are similarly regulated by Cten  
75 and TGF- $\beta$ 1. Both molecules seem to use FAK as a downstream messenger. However, a possible role of  
76 Cten in TGF- $\beta$ 1 mediated EMT and cell motility in CRC cells has not yet been postulated. Therefore, it  
77 was hypothesised that TGF- $\beta$  may induce cell motility and promote EMT processes through the Cten  
78 signalling pathway.

79

## 80 **MATERIALS AND METHODS**

### 81 **Cell Culture**

82 This work was performed in CRC cell lines HCT116 and SW620, which were a kind gift from Prof  
83 Ian Tomlinson. This work was also carried out in SW620 $\Delta$ Cten cell line which was previously established by  
84 our group (16). All cells were cultured in Dulbecco's Modified Eagle's Medium (DMEM) (GlutaMAX<sup>TM</sup>  
85 supplement, Thermo Fisher Scientific, Carlsbad, CA) antibiotic free supplemented with 10% foetal bovine  
86 serum (FBS) (Sigma) and maintained at 37°C in a 5% CO<sub>2</sub> atmosphere. Cell line identities were  
87 authenticated by STR profiling.

88

### 89 **Cell Transfection**

90 Cells were transfected with small interfering RNA (siRNA) targeted to TGF- $\beta$ 1 (CCA CCU GCA  
91 AGA CUA UCG ACA UGG A) or luciferase (CGU ACG CGG AAU ACU UCG A) as a negative control  
92 using Lipofectamine 2000 (Invitrogen) according to the manufacturer's protocol. Cells were grown to 40-  
93 50% confluency and siRNA duplexes were added at a final concentration of 10 nM and 10  $\mu$ l of  
94 Lipofectamine 2000. The cells were incubated with the transfection reagents for 6 hours and experiments  
95 performed 48 hours post transfection.

96

### 97 **Cell Treatment**

98 In order to stimulate TGF $\beta$ 1 signalling, cells were seeded in a six well plate and starved in serum  
99 free DMEM for 24 hours at 37<sup>0</sup>C prior to stimulation. Cells at 50-60% confluency were treated with 0–20  
100 ng/ml Recombinant Human TGF $\beta$ 1 (R&D Systems) in DMEM growth media (supplemented with 10%  
101 FBS), with a total volume of 2 ml per well. Cells were harvested after incubation for 48 hours.

102

### 103 **Western Blot**

104 Cell lysates were prepared using RIPA lysis buffer (Thermo Fisher Scientific) supplemented with  
105 phosphatase and protease inhibitor (Thermo Fisher Scientific). Fifty micrograms of protein was added to  
106 NUPAGE LDS Sample Buffer (Thermo Fisher Scientific) containing 5%  $\beta$ -mercaptoethanol. The protein  
107 samples were heated to 90<sup>0</sup>C on a heat block for 5 minutes and cooled on ice for another 5 minutes.  
108 Following this, the protein samples were fractionated on a pre-cast 4–12% NUPAGE Bis-Tris-HCl buffered  
109 (pH 6.4) polyacrylamide gel (Thermo Fisher Scientific) using the NUPAGE gel electrophoresis system with  
110 NUPAGE MOPS SDS Running Buffer (Thermo Fisher Scientific) at 125 V for 90 minutes. Proteins were  
111 then transferred onto PVDF membrane (GE Life Sciences) using the Trans Blot semi-dry transfer system  
112 (Biorad). Following blocking in 5% milk or 5% BSA in 0.1% tween PBS or 0.1% tween TBS (dependent  
113 on antibody diluents), membranes were incubated with optimally diluted primary antibodies overnight at  
114 4<sup>0</sup>C (supplementary Table 1). Following washing, membranes were incubated with the appropriate anti-  
115 mouse or anti-rabbit secondary antibody for 1 h at room temperature (supplementary Table 1). The ECL  
116 prime detection kit (GE Life Sciences) was used for protein band visualisation using the C-DiGiT Blot  
117 Scanner (LI-COR, Lincoln, NE). Densitometric analysis of the bands was performed using ImageJ  
118 software. Pixel counts for each protein of interest were normalized to  $\beta$ -actin.

119

### 120 **Nuclear and Cytoplasmic Extraction**

121 The nuclear and cytoplasmic fractions were extracted using the NE-PER Nuclear and Cytoplasmic  
122 Extraction Kit (Thermo Scientific) according to the manufacturer's protocol. Briefly, cells were harvested  
123 by trypsinisation 48 hours post transfection and pelleted by centrifuging at 500 x g for 5 minutes. The pellet

124 was then lysed in ice-cold CER I supplemented with protease inhibitor for 10 minutes, followed by addition  
125 of ice- cold CER II and incubation on ice for 1 minute. Cell lysates were then centrifuged at 16,000 x g for  
126 5 minutes at 4°C and the supernatant containing cytoplasmic proteins was removed and stored for use. The  
127 insoluble pellet was resuspended in ice-cold NER supplemented with protease inhibitor and incubated on  
128 ice for 40 minutes and then centrifuged at 16,000 x g for 5 minutes at 4°C. Next, the supernatant containing  
129 nuclear fractions was transferred to a clean, pre-chilled tube. Thereafter, western blotting was performed as  
130 previously described.

131

### 132 **Immunofluorescence**

133 Cells were seeded in multi chamber slides and incubated at 37°C for 24 hours post transfection or  
134 treatment. Cells were washed in PBS for 5 minutes on a shaker and fixed with 1:1 acetone/methanol for 20  
135 minutes at -20°C. Following this, cells were washed three times in PBS for 5 minutes each and blocked  
136 with 1% BSA and 22.52 mg/mL glycine in PBS-T (PBS+0.1% Tween 20) at room temperature for 60  
137 minutes. After blocking, the primary antibody diluted in 1% BSA+PBS-T was incubated with cells  
138 overnight with gentle rotation at 4°C (supplementary Table 2). Then, cells were washed three times in PBS  
139 for 5 minutes each and incubated with Alexa Fluor 488 (green) or Alexa Fluor 568 (17) secondary antibody  
140 (Thermo Fisher Scientific) diluted in 1% BSA+PBS-T with gentle rotation at room temperature in the dark  
141 for 60 minutes. Cells were then washed three times in PBS-T for 5 minutes in the dark and incubated with  
142 1x DAPI (1:5000) (Sigma) in PBS with gentle rotation for 30 minutes. Following this, cells were again  
143 washed a further 2 times in PBS for 5 minutes in the dark and mounted with a drop of fluorescein mounting  
144 media (Sigma) on glass slides. The cells were viewed using the Leica Microsystems confocal microscope  
145 at x40 objective and Leica Application Suite X software was used for image acquisition.

146

### 147 **Cell Viability Assay**

148 PrestoBlue Cell Viability Reagent (Thermo Fisher Scientific) was used as an indirect method to  
149 measure the total number of live cells. Briefly,  $5 \times 10^3$  cells were seeded in a 96 well plate and allowed to

150 attach for 24 hours. Following this, 100  $\mu$ l of PrestoBlue Cell Viability Reagent was added to the cells and  
151 without cells as control, and incubated for 1 hour at 37°C. Following incubation, the fluorescent unit (OD)  
152 of each well of the 96 well plate was then measured using the BMG FLUOstar Optima Plate reader (540  
153 nm/ 590 nm). Further readings were taken at 48 and 72-hour time points. The blank fluorescence reading  
154 was subtracted from each experimental fluorescence reading and the blank corrected values were then  
155 normalised to the 24 hour time point.

156

### 157 **Transwell Migration and Invasion Assays**

158 The changes in cell migration were assessed in 24 well plates using the Transwell system (Corning,  
159 Corning, NY). Cells were treated with mitomycin C (10  $\mu$ g/ml) for 3 hours and washed 3 times with PBS  
160 to inhibit cell proliferation. The Transwell inserts (6.5 mm diameter; 8  $\mu$ m pore size) were incubated in  
161 DMEM at 37°C for 1 hour prior to use. Following this, 600  $\mu$ l of DMEM (20% FBS) was added to the outer  
162 wells of the Transwell plate and the Transwell inserts placed inside. A total of  $1 \times 10^5$  cells in DMEM (10%  
163 FBS) were seeded onto the Transwell insert. The plate was incubated at 37°C for 24 hours. Following this,  
164 the cells that had migrated through to the bottom of the outside well, using the higher FBS concentration as  
165 a chemoattractant, were manually counted. Triplicate wells were seeded for each experimental condition.  
166 The Transwell invasion assay was performed according to this protocol with the exception that  $2 \times 10^5$  cells  
167 were seeded onto a Transwell insert coated in matrigel reduced growth factor (0.3 mg/ml, Corning) and  
168 cells allowed to migrate for 48 hours prior to counting.

169

### 170 **Wound Healing**

171 Wound healing” scratch assay was performed as an alternative assay to assess cell migration.  
172 Briefly,  $5-7 \times 10^5$  cells /ml were seeded into culture-insert 2 well (Ibidi) attached in 6 well plates and  
173 incubated for 24 hours at 37°C until they reached confluency. After cell attachment, the culture inserts were  
174 removed, and the cells were treated with mitomycin C (10  $\mu$ g/ml) for 3 hours to inhibit proliferation. Cells  
175 were cultured under normal conditions, and the pictures were taken at time points 0, 24, or 48 using an

176 inverted microscope (Nikon) at 10x magnification. The width of the cell free gap was approximately 500  
177 microns (+/- 50 microns) at time 0 hours. Experiments were performed in duplicate and on at least on two  
178 separate occasions. Cell migration was assessed by measuring the remaining open area of the wound by  
179 ImageJ software.

180

### 181 **Statistical Analysis**

182 Results were tested for a normal distribution, and the unpaired t-test or analysis of variance  
183 (ANOVA) statistical tests were applied using GraphPad Prism (version 6).

184

## 185 **RESULTS**

### 186 **TGF- $\beta$ 1 Regulates Cten Expression**

187 Both TGF- $\beta$ 1 and Cten induce EMT and cell motility and are associated with integrin signalling.  
188 Thus it was of interest to determine whether Cten expression is under the regulation of the TGF- $\beta$ 1  
189 signalling pathway in CRC cells. To investigate this, SW620 cells were treated with different concentrations  
190 of TGF- $\beta$ 1-human recombinant protein (R&D systems) from 0 to 20 ng/ml for 48 hours and the changes in  
191 protein level of Cten and its downstream targets, ROCK1, N-cadherin, E-cadherin, Src, and Snail were  
192 evaluated by western blot. SW620 cells showed a dose-dependent increase in Cten, ROCK1, Src, Snail, and  
193 N-cadherin expression, whereas the protein expression level of E-cadherin was decreased following  
194 stimulation with TGF- $\beta$ 1 (Figure 1 A). The optimum concentration of TGF- $\beta$ 1-human recombinant protein  
195 (20 ng/ml) was selected for subsequent TGF- $\beta$ 1 stimulation experiments.

196

197 The relationship between TGF- $\beta$ 1 and Cten was further investigated in an additional cell line,  
198 HCT116. In agreement with the findings in SW620 cells, stimulation of TGF- $\beta$ 1 was associated with an  
199 increase in the protein expression levels of Cten, ROCK1, Src, Snail, and N-cadherin, whereas E-cadherin  
200 expression was inhibited ( Figure 2 A). The ability of TGF- $\beta$ 1 to alter cell motility and viability was then  
201 investigated using the Transwell migration assay, wound healing assay, Transwell Matrigel invasion assay,



202 and cell viability assay. In both SW620 and HCT116 cell lines, cell migration, invasion, and proliferation  
203 were increased when cells were treated with TGF- $\beta$ 1-human recombinant protein compared to untreated  
204 control (Figure 1B,C,D,E), (Figure 2B,C,D,E).

205  
206 The effect of TGF- $\beta$ 1 on Cten and its downstream targets was again investigated in SW620 cell but  
207 using an alternative methodology. Assuming that there was some endogenous production of TGF- $\beta$ 1 by the  
208 cell lines, this was transiently knocked down by siRNA and changes in protein expression level of Cten,  
209 ROCK1, Src, Snail, E-cadherin and N-cadherin were evaluated by western blot. Confirming the TGF- $\beta$ 1  
210 stimulation results, knockdown of TGF- $\beta$ 1 resulted in a reduction of Cten, ROCK1, Src, Snail, N-cadherin  
211 protein expression levels. Additionally, TGF- $\beta$ 1 knock down was associated with an increase in the  
212 expression level of E-cadherin compared to luciferase targeting siRNA control (Figure 3 A). The effect of  
213 TGF- $\beta$ 1 knockdown on cell functions was also tested in this study (Figure 3B,C,D,E). Knockdown of TGF-  
214  $\beta$ 1 was associated with a significant decrease in cell migration, invasion and proliferation compared to the  
215 luciferase control (Figure 3). Collectively, these findings suggest that TGF- $\beta$ 1 may promote both cell  
216 motility and proliferation through the upregulation of EMT processes in CRC cells.

217  
218 **TGF $\beta$ 1 Induces Nuclear Localisation of Cten/Src/ROCK1/Snail.**

219 Cten is normally located at focal adhesions but we and others have shown that there is also nuclear  
220 localisation (although the significance of this is uncertain). Since TGF- $\beta$ 1 signalling may be mediated  
221 through Cten, it was of interest whether TGF- $\beta$ 1 is capable of inducing Cten protein translocation to the  
222 nucleus. HCT116 cells were stimulated with TGF- $\beta$ 1 and the expression of Cten and its downstream targets  
223 in nucleus were observed by immunofluorescences staining (Figure 5A). The results showed that  
224 stimulation of HCT116 cell with TGF- $\beta$ 1 for 48 h induced Cten, Src, ROCK, and Snail protein expression  
225 as well as translocation to the nucleus. In contrast, in untreated HCT116 cells, there was no Cten or its  
226 downstream target proteins detected in the nucleus (Figure 5A). To validate these data, TGF- $\beta$ 1 was used  
227 to stimulate the SW620 cell line and both immunofluorescence staining and nuclear and cytoplasmic

228 extraction were performed to directly determine the subcellular localisation of Cten and its downstream  
229 targets: Src, ROCK1, and Snail proteins. Subcellular fractionation experiments showed an increase in the  
230 nuclear fraction of Cten, Src, ROCK1, or Snail proteins following treatment with TGF- $\beta$ 1 (Figure 4).  
231 Immunofluorescence imaging showed that, as with HCT116, stimulation of SW620 with TGF- $\beta$ 1  
232 treatment increased the expression and nuclear translocation of Cten, ROCK1, Src, and Snail compared to  
233 the untreated cell control (Figure 5B).

234 To investigate whether Cten was essential for TGF- $\beta$ 1 induced the nuclear translocation of Src,  
235 ROCK and Snail proteins through Cten, the cell line SW620 $\Delta$ Cten, was stimulated with TGF- $\beta$ 1 and the  
236 nuclear translocation of the protein was determined by immunofluorescence. The results revealed that , in  
237 the absence of Cten, the nuclear translocation of Src, ROCK and Snail following TGF- $\beta$ 1 stimulation  
238 (Figure 5 B), does not occur. Taken together, these data suggest that nuclear translocation of ROCK1, Src,  
239 and Snail protein is probably mediated by TGF- $\beta$ 1 via the upregulation of the Cten signalling pathway

240

#### 241 **Cten deletion selectively abrogates TGF- $\beta$ 1 Induced Cell Migration and Invasion.**

242

243 Our data have shown that TGF $\beta$ 1 is a positive regulator of Cten expression and a number of markers  
244 of EMT. We also showed that TGF $\beta$ 1 signalling induces cell motility (both migration and invasion). Since  
245 these Cten induces EMT and cell motility, it is reasonable to hypothesise that Cten in a direct mediator of  
246 TGF $\beta$ 1 activity. We have previously described the creation of SW620 $\Delta$ Cten (16). This is derivative of SW620  
247 in which Cten has been deleted using CRISPR/Cas9 technology. In order to test our hypothesis, SW620 $\Delta$ Cten  
248 was stimulated with TGF $\beta$ 1 and Western blotting was performed. The results revealed that stimulation with  
249 with TGF- $\beta$ 1 was associated with a small increase in N-cadherin expression but ROCK1, Src, Snail, and E-  
250 cadherin protein expression level remained unchanged compared to the sham-treated cells control (Figure  
251 6 A). This implies that Cten is may be responsible for TGF- $\beta$ 1 induced EMT.

252 To determine if Cten was functionally relevant to TGF- $\beta$ 1 mediated activity, SW620 $\Delta$ Cten was  
253 stimulated TGF- $\beta$ 1 and a assays for Transwell migration, wound healing, Matrigel invasion, and cell

254 viability were performed. (Figure 4B,C,D,)The deletion of Cten in SW620<sup>ΔCten</sup> cells resulted in an  
255 abrogation of the ability of TGF-β1 to induce cell migration or invasion whilst the ability to induce cell  
256 proliferation was retained. Thus Cten appears not to be involved in TGF-β1 induced cell proliferation, but  
257 it may be a signalling intermediate in the TGF-β1/EMT pathway regulating cell migration and invasion in  
258 CRC cells.

259

## 260 **DISCUSSION**

261 EMT is a critical process occurring during tumour metastasis. During the EMT process, epithelial  
262 cells show loss of cell to cell adhesion by E-cadherin downregulation at adherens junctions, cytoskeleton  
263 reorganisation via switching from keratin to vimentin intermediate filaments, loss of apical-basal polarity,  
264 acquisition of mesenchymal cell phenotype and increased cell invasion and migration (18). Cten has been  
265 shown to act as oncogene in most tumour types and involved in regulation of EMT processes, however, the  
266 mechanisms that upregulate the expression of Cten induced EMT have not been elucidated (16, 19-21).  
267 Previous research from our laboratory suggested that Cten expression is regulated by EGFR/KRAS  
268 signalling (5) and the study by Katz et al (3) showing the role of Her2 in up-regulating Cten would seem to  
269 validate this. We and others further have also found that Cten could be under the regulation of several  
270 cytokines such as IL6/Stat3 and growth factors (6, 22). The present study directly shows, for the first time  
271 an essential role for Cten in TGF-β1-induced EMT and cell motility in CRC cells and that this may be  
272 through upregulation of the Src/ROCK1/Snail signalling pathway.

273 TGF-β1 reputedly plays a key role in promoting EMT initiation and tumour metastasis. In the latest  
274 classification of CRCs (25), the most aggressive class (CMS4) is characterised by TGF-β activation. It has  
275 been documented that TGF-β1 induces the expression of several transcription factors including Twist, Zeb,  
276 Slug, and Snail (23). Here, using different methods of modulating TGF-β1 activity, we have shown that  
277 TGF-β1 is a positive regulator of Cten expression. We have also shown that TGF-β1 is a positive regulator  
278 of Src, ROCK, and Snail expression. Since these are putative targets of Cten, it begs the question whether,  
279 in this case, they are directly up-regulated by TGF-β1 signalling or whether they are up-regulated by Cten

280 as a secondary event. Using the SW620<sup>ΔCten</sup> cell line (in which Cten is deleted) we were able to conclusively  
281 show that up-regulation of these molecules is Cten-dependent. We observed, by both immunofluorescence  
282 and cellular fractionation, that TGF-β1 signalling induced nuclear localisation of Cten as well as Src,  
283 ROCK, and Snail. We were similarly able to show that nuclear localisation of Src, ROCK, and Snail was  
284 Cten-dependent. The mechanisms by which these proteins are up-regulated and by which their cellular  
285 location is controlled are uncertain although we have previously shown that Cten causes post-translational  
286 stabilisation of Snail (16). The link between TGF-β1 and Cten may be through integrins since TGF-β1  
287 induces integrin activation and Cten is found in complex with the cytoplasmic tail of integrins. However  
288 there are also several other downstream targets of TGF-β1 mediated EMT which may possibly be involved  
289 in regulation of Cten and further investigation of markers/signalling pathways such as Ras/MAPK (10),  
290 RhoA (11), and Jagged 1/Notch (12) is warranted.

291 Our data suggest a novel downstream signalling pathway for TGF-β1 which is mediated through  
292 Cten. In order to ascertain whether this represented a functionally relevant pathway, we performed assays  
293 to assess motility (both by invasion and migration assays) and cell proliferation. In our models, TGF-β1  
294 signalling was shown to increase cell proliferation, migration (both transwell migration and wound healing)  
295 and cell invasion. These data are in accordance with previous studies that TGF-β1 induced EMT can  
296 promote cell motility and proliferation in a vast range of different tumour cells such as breast cancer and  
297 oral squamous cell carcinoma (24, 26). Intuitively one would think that the induction of cell motility was  
298 mediated through the Cten pathway. This was confirmed by our observation that there was a selective loss  
299 of the effect of TGF-β1 treatment on both cell migration and invasion in the SW620<sup>ΔCten</sup> cell line while the  
300 effect of TGF-β1 treatment on cell proliferation was unaffected. This is completely in line with our previous  
301 data showing that Cten regulates cell motility and does not affect cell proliferation (19).

302 It is not unexpected that TGF-β1 will activate different signalling pathways to regulate different  
303 cellular functions. Our data show that the Cten pathway is an important factor in the TGF-β1 regulation of  
304 cell motility and they may explain other observations that have been made. Thus previous published data  
305 from our group have shown that Cten induces EMT and promotes cell motility through FAK, ILK and Snail

306 signalling (16, 21, 27). Others have shown that FAK and/or ILK are required for TGF- $\beta$ 1 induced EMT  
307 and to promote cell motility (13, 28). Snail also has been shown to act as a mediator of TGF- $\beta$ 1 induced  
308 EMT(29). We would now hypothesise that Cten is one of the missing links which would explain  
309 FAK/ILK/Snail dependence of TGF- $\beta$ 1 induced cell motility.

310 In addition to Cten, there are other downstream pathways involved in TGF- $\beta$ 1 mediated cell  
311 migration, including JAK/STAT3 (30), PI3K-Akt (31), and Reelin (32), so it would be of interest to  
312 determine whether Cten acts in parallel or synergistically with these pathways in future studies  
313

314 In summary, the data presented have indicated that TGF $\beta$ 1 and Cten signalling may cooperate in  
315 promoting EMT and cell motility. Regulation of downstream markers of EMT such as Src/ROCK1/Snail  
316 by TGF $\beta$ 1 is dependent on Cten. These processes are relevant to the development of metastasis and our  
317 data open up the possibility of targeting Cten in CRC.

318

319

320 **Funding:** This work was supported by the Saudi Arabian Cultural Bureau in Britain (S3555).

321 **Conflict of interest:** The authors declare that they have no conflicts of interest with the contents  
322 of this article

323

## 324 REFERENCES

- 325 1. Lo SH, Lo TB. 2002. Cten, a COOH-terminal tensin-like protein with prostate restricted expression,  
326 is down-regulated in prostate cancer. *Cancer Research* 62:4217-4221.
- 327 2. Sasaki, H., Moriyama, S., Mizuno, K., Yukiue, H., Konishi, A., Yano, M., Kaji, M., Fukai, I.,  
328 Kiriya, M., and Yamakawa, Y. 2003. Cten mRNA expression was correlated with tumor progression in  
329 lung cancers. *Lung Cancer* 40, 151-155

- 330 3. Katz M, Amit I, Citri A, Shay T, Carvalho S, Lavi S, Milanezi F, Lyass L, Amariglio N, Jacob-  
331 Hirsch J. 2007. A reciprocal tensin-3–cten switch mediates EGF-driven mammary cell migration. *nature*  
332 *cell biology* 9:961-969.
- 333 4. Cao X, Voss C, Zhao B, Kaneko T, Li SS-C. 2012. Differential regulation of the activity of deleted  
334 in liver cancer 1 (DLC1) by tensins controls cell migration and transformation. *Proceedings of the National*  
335 *Academy of Sciences* 109:1455-1460.
- 336 5. Al-Ghamdi S, Albasri A, Cachat J, Ibrahim S, Muhammad BA, Jackson D, Nateri AS, Kindle KB,  
337 Ilyas M. 2011. Cten is targeted by Kras signalling to regulate cell motility in the colon and pancreas. *PloS*  
338 *one* 6:e20919.
- 339 6. Thorpe H, Akhlaq M, Jackson D, Ghamdi SA, Storr S, Martin S, Ilyas M. 2015. Multiple pathways  
340 regulate Cten in colorectal cancer without a Tensin switch. *International journal of experimental pathology*  
341 96:362-369.
- 342 7. Bennett DT, Reece TB, Foley LS, Sjoberg A, Meng X, Fullerton DA, Weyant MJ. 2015. C-terminal  
343 tensin-like protein mediates invasion of human lung cancer cells and is regulated by signal transducer and  
344 activator of transcription 3. *The Journal of thoracic and cardiovascular surgery* 149:369-375.
- 345 8. Araki S, Eitel JA, Batuello CN, Bijangi-Vishehsaraei K, Xie X-J, Danielpour D, Pollok KE,  
346 Boothman DA, Mayo LD. 2010. TGF- $\beta$ 1–induced expression of human Mdm2 correlates with late-stage  
347 metastatic breast cancer. *The Journal of clinical investigation* 120:290.
- 348 9. Nagaraj NS, Datta PK. 2010. Targeting the transforming growth factor- $\beta$  signaling pathway in  
349 human cancer. *Expert opinion on investigational drugs* 19:77-91.
- 350 10. Janda E, Lehmann K, Killisch I, Jechlinger M, Herzig M, Downward J, Beug H, Grünert S. 2002.  
351 Ras and TGF $\beta$  cooperatively regulate epithelial cell plasticity and metastasis. *The Journal of cell biology*  
352 156:299-314.
- 353 11. Bhowmick NA, Ghiassi M, Bakin A, Aakre M, Lundquist CA, Engel ME, Arteaga CL, Moses HL.  
354 2001. Transforming growth factor- $\beta$ 1 mediates epithelial to mesenchymal transdifferentiation through a  
355 RhoA-dependent mechanism. *Molecular biology of the cell* 12:27-36.

- 356 12. Zavadil J, Cermak L, Soto-Nieves N, Böttinger EP. 2004. Integration of TGF- $\beta$ /Smad and  
357 Jagged1/Notch signalling in epithelial-to-mesenchymal transition. *The EMBO journal* 23:1155-1165.
- 358 13. Cicchini C, Laudadio I, Citarella F, Corazzari M, Steindler C, Conigliaro A, Fantoni A, Amicone  
359 L, Tripodi M. 2008. TGF $\beta$ -induced EMT requires focal adhesion kinase (FAK) signaling. *Experimental*  
360 *cell research* 314:143-152.
- 361 14. Silginer, M., Burghardt, I., Gramatzki, D., Bunse, L., Leske, H., Rushing, E., Hao, N., Platten, M.,  
362 Weller, M., and Roth, P. 2016. The aryl hydrocarbon receptor links integrin signaling to the TGF- $\beta$   
363 pathway. *Oncogene* 35, 3260.
- 364 15. Choi H-J, Park M-J, Kim B-S, Choi H-J, Joo B, Lee KS, Choi J-H, Chung T-W, Ha K-T. 2017.  
365 Transforming growth factor  $\beta$ 1 enhances adhesion of endometrial cells to mesothelium by regulating  
366 integrin expression. *BMB reports* 50:429.
- 367 16. Thorpe H, Asiri A, Akhlaq M, Ilyas M. 2017. Cten promotes epithelial-mesenchymal transition  
368 through post-transcriptional stabilization of Snail. *Molecular Carcinogenesis*.
- 369 17. Carrato A. 2008. Adjuvant treatment of colorectal cancer. *Gastrointestinal cancer research: GCR*  
370 2:S42.
- 371 18. Chui MH. 2013. Insights into cancer metastasis from a clinicopathologic perspective: Epithelial-  
372 Mesenchymal Transition is not a necessary step. *International journal of cancer* 132:1487-1495.
- 373 19. Albasri A, Seth R, Jackson D, Benhasouna A, Crook S, Nateri AS, Chapman R, Ilyas M. 2009. C-  
374 terminal Tensin-like (CTEN) is an oncogene which alters cell motility possibly through repression of E-  
375 cadherin in colorectal cancer. *The Journal of pathology* 218:57-65.
- 376 20. Albasri A, Aleskandarany M, Benhasouna A, Powe DG, Ellis IO, Ilyas M, Green AR. 2011b.  
377 CTEN (C-terminal tensin-like), a novel oncogene overexpressed in invasive breast carcinoma of poor  
378 prognosis. *Breast cancer research and treatment* 126:47-54.
- 379 21. Al-Ghamdi S, Cachat J, Albasri A, Ahmed M, Jackson D, Zaitoun A, Guppy N, Otto WR, Alison  
380 MR, Kindle KB. 2013. C-terminal tensin-like gene functions as an oncogene and promotes cell motility in  
381 pancreatic cancer. *Pancreas* 42:135-140.

- 382 22. Hung SY, Shih YP, Chen M, Lo SH. 2014. Up-regulated cten by FGF2 contributes to FGF2-  
383 mediated cell migration. *Molecular carcinogenesis* 53:787-792.
- 384 23. Peinado H, Olmeda D, Cano A. 2007. Snail, Zeb and bHLH factors in tumour progression: an  
385 alliance against the epithelial phenotype? *Nature Reviews Cancer* 7:415-428.
- 386 24. Pang M, Georgoudaki A, Lambut L, Johansson J, Tabor V, Hagikura K, Jin Y, Jansson M,  
387 Alexander J, Nelson C. 2016. TGF- $\beta$ 1-induced EMT promotes targeted migration of breast cancer cells  
388 through the lymphatic system by the activation of CCR7/CCL21-mediated chemotaxis. *Oncogene* 35:748-  
389 760.
- 390 25. Guinney J, Dienstmann R, Wang X, de Reyniès A, Schlicker A, Soneson C, Marisa L, Roepman P,  
391 Nyamundanda G, Angelino P, Bot BM, Morris JS, Simon IM, Gerster S, Fessler E, De Sousa E Melo F,  
392 Missiaglia E, Ramay H, Barras D, Homicsko K, Maru D, Manyam GC, Broom B, Boige V, Perez-Villamil  
393 B, Laderas T, Salazar R, Gray JW, Hanahan D, Tabernero J, Bernards R, Friend SH, Laurent-Puig P,  
394 Medema JP, Sadanandam A, Wessels L, Delorenzi M, Kopetz S, Vermeulen L, Tejpar S. 2015.  
395 The consensus molecular subtypes of colorectal cancer. *Nature Medicine* 21(11):1350-6.
- 396 26. Bu J, Chen F. 2017. TGF- $\beta$ 1 promotes cells invasion and migration by inducing epithelial  
397 mesenchymal transformation in oral squamous cell carcinoma. *European Review for Medical and*  
398 *Pharmacological Sciences* 21:2137-2144.
- 399 27. Albasri A, Al-Ghamdi S, Fadhil W, Aleskandarany M, Liao Y, Jackson D, Lobo D, Lo S, Kumari  
400 R, Durrant L. 2011a. Cten signals through integrin-linked kinase (ILK) and may promote metastasis in  
401 colorectal cancer. *Oncogene* 30:2997-3002.
- 402 28. Lee Y-I, Kwon Y-J, Joo C-K. 2004. Integrin-linked kinase function is required for transforming  
403 growth factor  $\beta$ -mediated epithelial to mesenchymal transition. *Biochemical and biophysical research*  
404 *communications* 316:997-1001.
- 405 29. Cho HJ, Baek KE, Saika S, Jeong M-J, Yoo J. 2007. Snail is required for transforming growth  
406 factor- $\beta$ -induced epithelial–mesenchymal transition by activating PI3 kinase/Akt signal pathway.  
407 *Biochemical and biophysical research communications* 353:337-343.



- 408 30. Liu R-Y, Zeng Y, Lei Z, Wang L, Yang H, Liu Z, Zhao J, Zhang H-T. 2014. JAK/STAT3 signaling  
409 is required for TGF- $\beta$ -induced epithelial-mesenchymal transition in lung cancer cells. *International journal*  
410 *of oncology* 44:1643-1651.
- 411 31. Bakin A, Tomlinson A, Bhowmick N, Moses H, Arteaga C. 2000. Phosphatidylinositol 3-kinase  
412 function is required for TGF-b-mediated epithelial to mesenchymal transition and cell migration. *J Biol*  
413 *Chem* 275:36803-36810.
- 414 32. Yuan Y, Chen H, Ma G, Cao X, Liu Z. 2012. Reelin is involved in transforming growth factor- $\beta$ 1-  
415 induced cell migration in esophageal carcinoma cells. *PloS one* 7:e31802.
- 416

417 **Figure legends**

418 **Figure 1:** TGF $\beta$ 1 increases Cten protein expression in a dose-dependent manner. A) SW620 cells  
419 were stimulated with TGF $\beta$ 1-human recombinant protein (R&D systems), (0-20 ng/ml) for 48 hours and  
420 the changes in Cten, ROCK1, N-cadherin, E-cadherin, Src, and Snail protein expression were determined  
421 by western blot (upper panel). Graph on the lower panel represents the densitometry values calculated for  
422 each protein band normalised to actin. Stimulation of SW620 cells with TGF $\beta$ 1 treatment (20 ng/ml for 48  
423 hours) induced closure of wound compared to untreated control (P = 0.0024). C) Stimulation of TGF $\beta$ 1 was  
424 associated with an increase in cell migration compared to untreated SW620 cells control (P = 0.0005). D)  
425 Treatment of SW620 cells with TGF- $\beta$ 1-human recombinant protein enhanced cell invasion compared to  
426 untreated control (P = 0.0055). E) Stimulation of TGF $\beta$ 1 in SW620 cells was associated with an increase  
427 in cell proliferation compared to untreated control (P  $\leq$  0.0001). Results are representative of at least 3  
428 experimental replicates. \*\*=P<0.01

429  
430 **Figure 2:** TGF $\beta$ 1 stimulation increases Cten protein expression in HCT116 cells. A) HCT116 cells  
431 were pre-treated with TGF- $\beta$ 1-human recombinant protein (20 ng/ml for 48 hours) and the changes in Cten,  
432 ROCK1, N-cadherin, E-cadherin, Src, and Snail protein expression were determined by western blot (upper  
433 panel). Graph on the lower panel represents the densitometry values calculated for each protein band  
434 normalised to actin. B) Treatment of HCT116 cells with TGF $\beta$ 1 TGF- $\beta$ 1-human recombinant protein (20  
435 ng/ml for 48 hours) induced wound closure compared to untreated control (P = 0.0084). C) Stimulation of  
436 TGF $\beta$ 1 was associated with an increase in cell migration compared to untreated HCT116 cells control (P =  
437 0.0032). D) Stimulation of SW620 cells with TGF $\beta$ 1 treatment increased cell invasion compared to  
438 untreated control (P = 0.0022). E) Stimulation of TGF $\beta$ 1 in HCT116 cells resulted in an increase in cell  
439 proliferation compared to untreated control (P  $\leq$  0.0001). Results are representative of at least 3  
440 experimental replicates. \*\*=P<0.01

441

442 **Figure 3:** TGF $\beta$ 1 knockdown decreases Cten protein expression in SW620 cells. A) SW620 cells  
443 were transfected with TGF $\beta$ 1 targeting siRNA duplexes (200 nM/ml for 48 hours) and the changes in Cten,  
444 ROCK1, N-cadherin, E-cadherin, Src, and Snail protein expression were determined by western blot (upper  
445 panel). Graph on the lower panel represents the densitometry values calculated for each protein band  
446 normalised to actin. B) Knockdown of TGF $\beta$ 1 in SW620 decreased wound closure compared to luciferase  
447 targeting siRNA control (P = 0.0016). C) Knockdown of TGF $\beta$ 1 was associated with a decrease in cell  
448 migration compared to luciferase transfected HCT116 cells control (P = 0.0003). D) Knockdown of TGF $\beta$ 1  
449 in SW620 cells decreased cell invasion compared to luciferase siRNA control (P = 0.0005). E) Knockdown  
450 of TGF $\beta$ 1 in SW620 cells resulted in a reduction in cell proliferation compared to luciferase siRNA control  
451 (P  $\leq$  0.0001). Results are representative of at least 3 experimental replicates. \*\*=P<0.01, \*\*\*=P<0.001  
452

453 **Figure 4:** TGF $\beta$ 1 induces nuclear translocation of Cten and its downstream targets in SW620 cells.  
454 A) Subcellular fractionation extraction was performed following the treatment of SW620 cell with or  
455 without 20 ng/ml of TGF- $\beta$ 1-human recombinant protein for 48 hours and the lysates were assessed by  
456 western blot. Lamin B1 and tubulin were used as loading control for cytoplasmic and nuclear fractions. B)  
457 Quantitative determination of the relative expression of ROCK1, Cten, Src, and Snail protein fractions  
458 following treatment with TGF $\beta$ 1.

459 **Figure 5:** TGF $\beta$ 1 induces nuclear localisation of Cten/Src/ROCK1/Snail. A and B) Stimulation of  
460 TGF $\beta$ 1 increases nuclear localisation and expression of Cten and its downstream targets in HCT116 and  
461 SW620 cells but this was lost when Cten was knocked out in SW620 $\Delta$ Cten cells. The subcellular localisation  
462 of ROCK1, Src, Cten, and Snail was examined by confocal microscopic images of DAPI (blue), nuclear  
463 envelope marker Lamin B (green) and ROCK1, Src, Cten or Snail protein (17) in untreated control and  
464 treated cells with TGF $\beta$ 1 stimulation (20ng/ml) for 48 hours. (scale bar 100  $\mu$ m).  
465

466 **Figure 6:** TGF $\beta$ 1 signals through Cten to regulates EMT and promotes cell migration and invasion.  
467 A) Stimulation of SW620 $\Delta$ Cten cells with TGF $\beta$ 1 treatment (20 ng/ml for 48 hours) was associated with a

468 small increase in N-cadherin expression and ROCK1, Src, Snail, and E-cadherin protein expression level  
469 remained unchanged from the untreated cells control (upper panel). Graph on the lower panel represents  
470 the densitometry values calculated for each protein band normalised to actin. B) Wound healing assay  
471 showed no significant differences between TGF $\beta$ 1 stimulation and untreated SW620 <sup>$\Delta$ Cten</sup> cells control (P =  
472 0.0585). C) Stimulation of TGF $\beta$ 1 in SW620 <sup>$\Delta$ Cten</sup> cells did not cause a significant increase in cell migration  
473 compared to untreated control (P = 0.1561). D) Treatment of SW620 <sup>$\Delta$ Cten</sup> cells with TGF- $\beta$ 1-human  
474 recombinant protein did not enhance cell invasion compared to untreated control (P = 0.1469). E)  
475 Stimulation of TGF $\beta$ 1 in SW620 <sup>$\Delta$ Cten</sup> cells was associated with an increase in cell proliferation compared  
476 to untreated control (P  $\leq$  0.0001). Results are representative of at least 3 experimental replicates. \*\*=P<0.01  
477

478

479 **Figure 1**

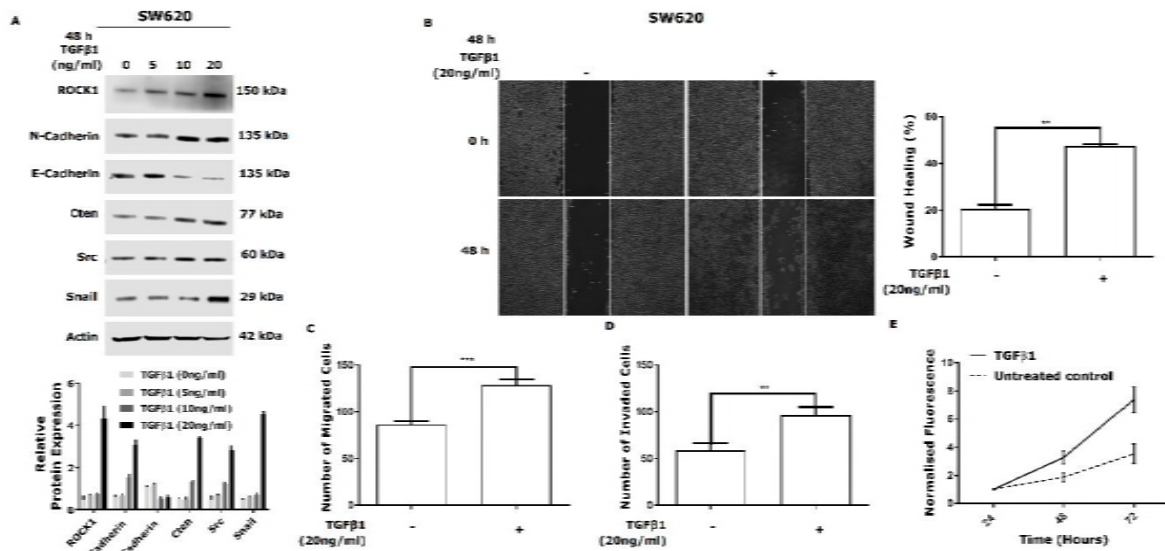

480

481

482 **Figure 2**

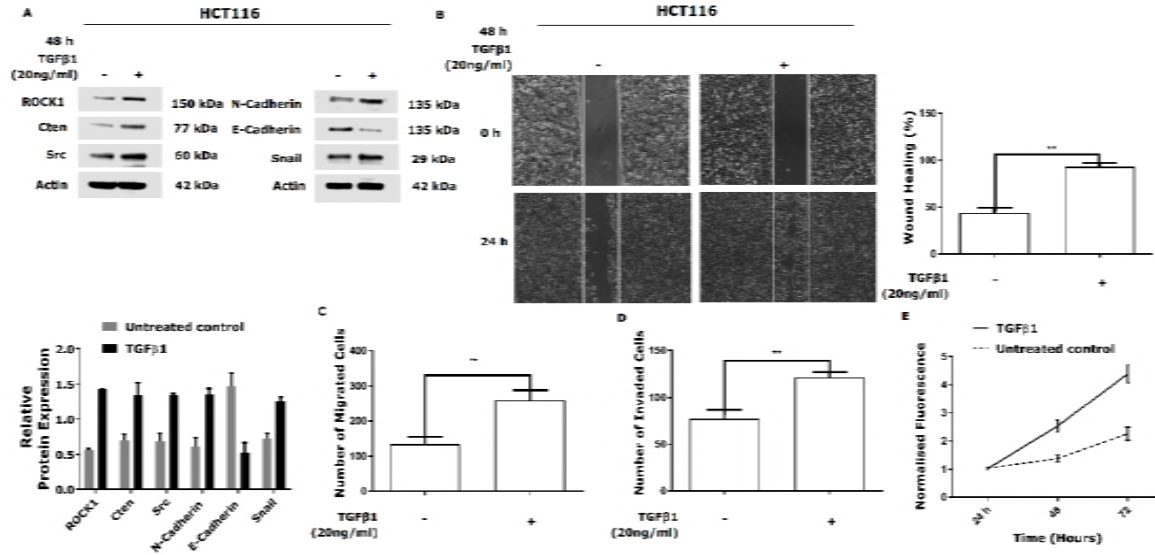

483

484

485 **Figure 3**

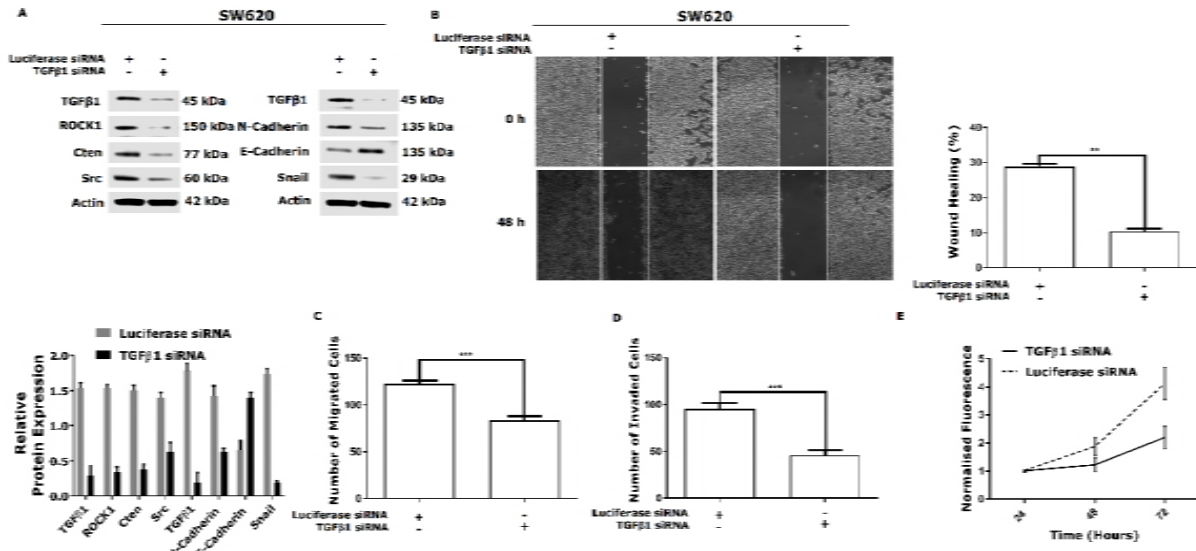

486

487

488 **Figure 4**

**A**

**SW620**

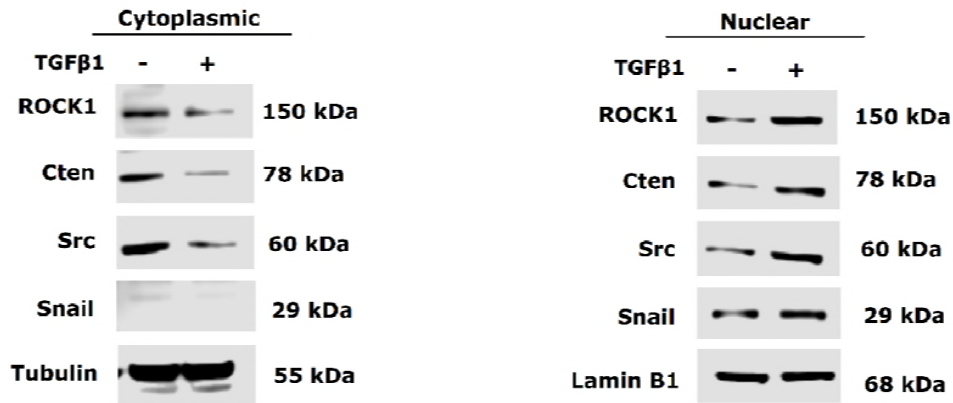

**B**

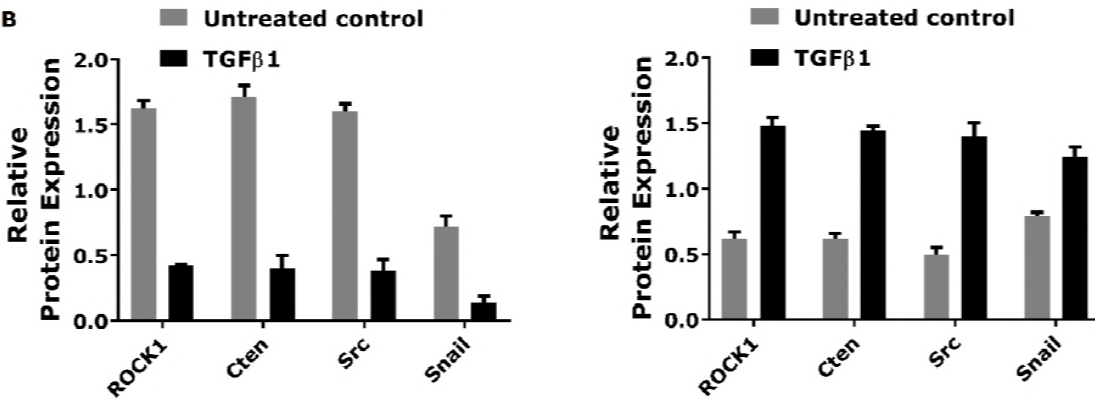

489

490



491 **Figure 5**

**A**

**HCT116**

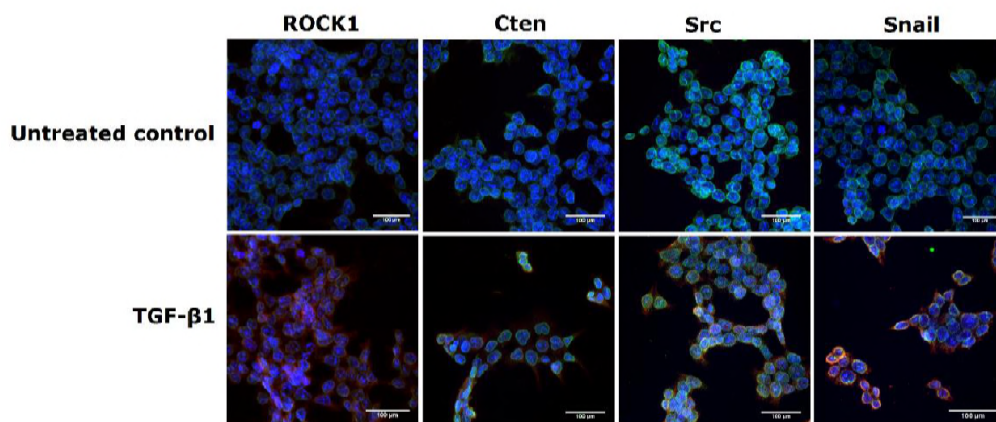

**B**

**SW620**

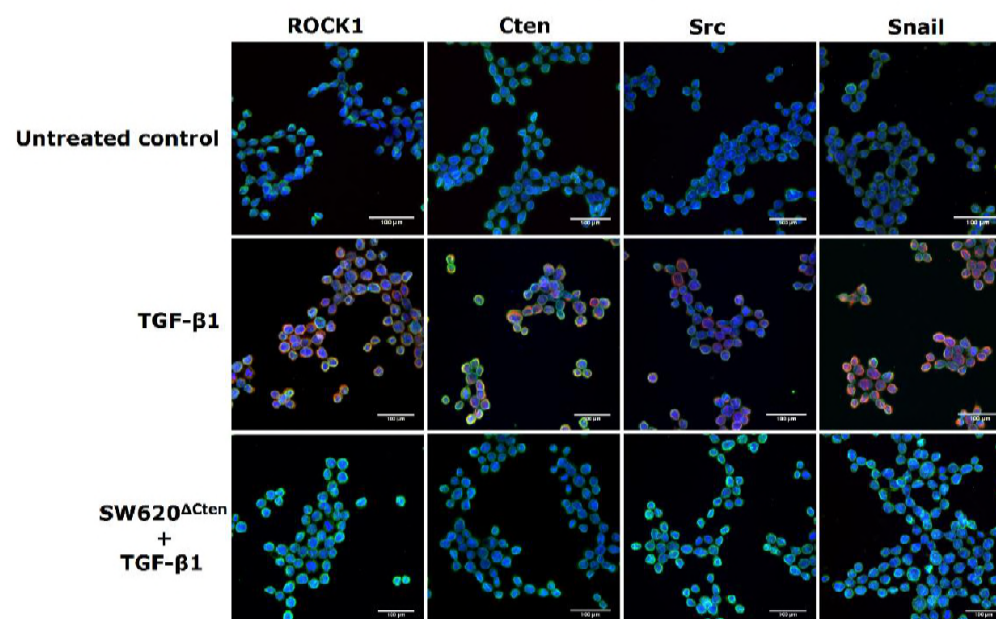

492

493

494 **Figure 6**

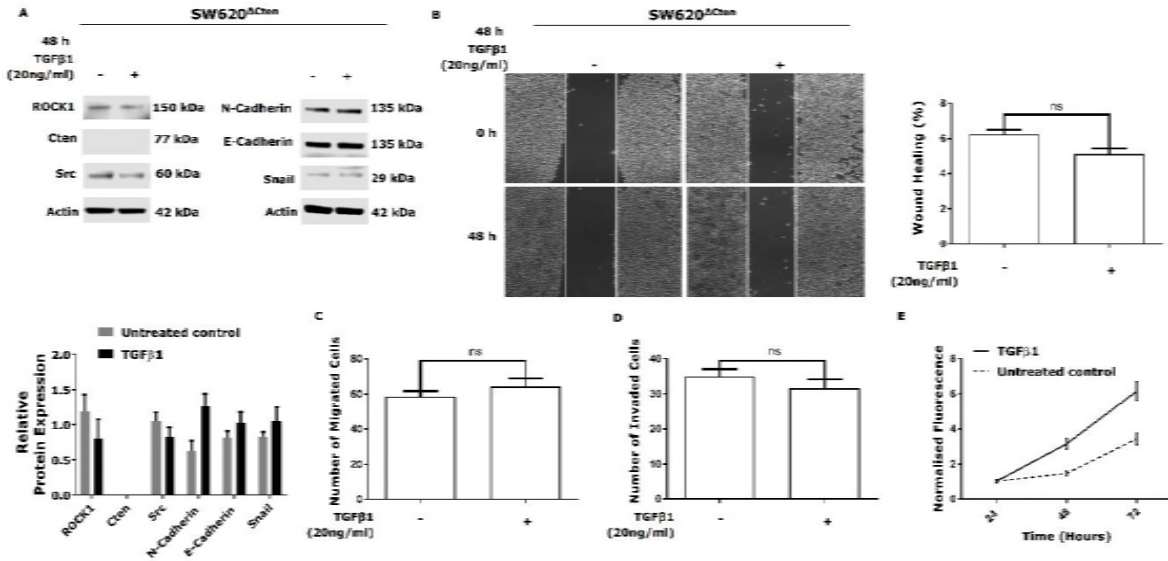

495

496

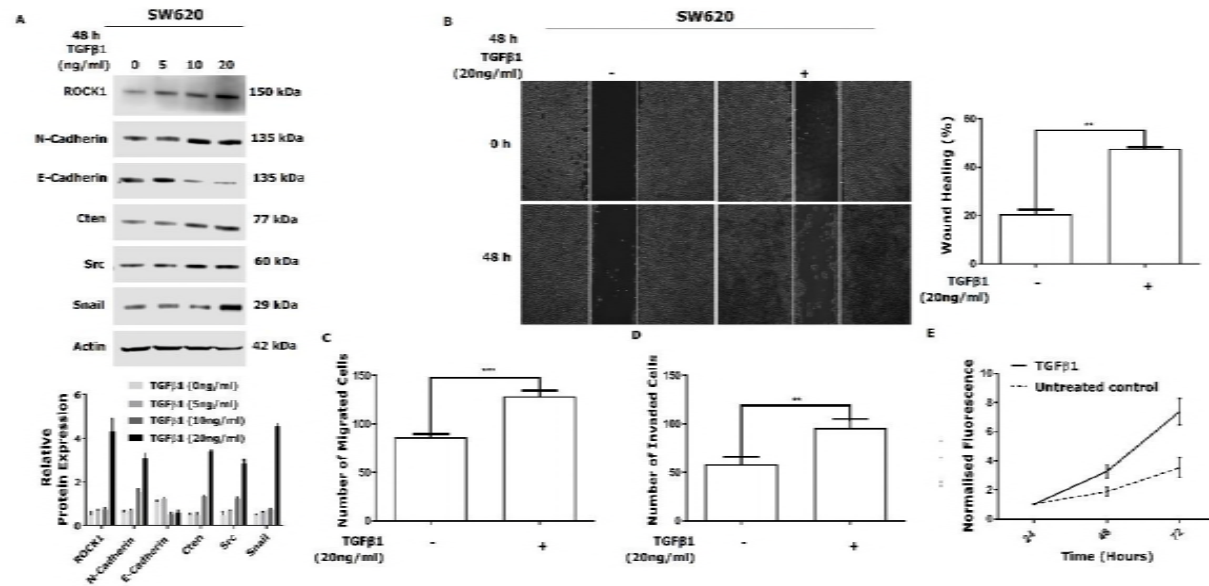

**Figure 1:** TGFβ1 increases Cten protein expression in a dose-dependent manner. A) SW620 cells were stimulated with TGFβ1-human recombinant protein (R&D systems), (0-20 ng/ml) for 48 hours and the changes in Cten, ROCK1, N-cadherin, E-cadherin, Src, and Snail protein expression were determined by western blot (upper panel). Graph on the lower panel represents the densitometry values calculated for each protein band normalised to actin. Stimulation of SW620 cells with TGFβ1 treatment (20 ng/ml for 48 hours) induced closure of wound compared to untreated control ( $P = 0.0024$ ). C) Stimulation of TGFβ1 was associated with an increase in cell migration compared to untreated SW620 cells control ( $P = 0.0005$ ). D) Treatment of SW620 cells with TGF-β1-human recombinant protein enhanced cell invasion compared to untreated control ( $P = 0.0055$ ). E) Stimulation of TGFβ1 in SW620 cells was associated with an increase in cell proliferation compared to untreated control ( $P \leq 0.0001$ ). Results are representative of at least 3 experimental replicates. \*\*= $P < 0.01$

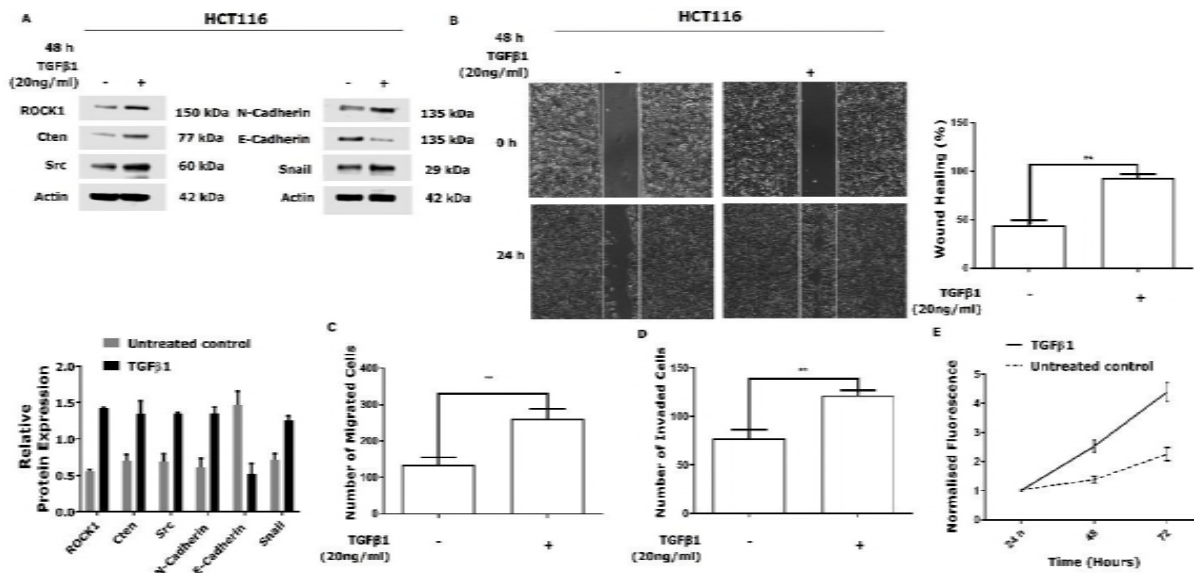

**Figure 2:** TGFβ1 stimulation increases Cten protein expression in HCT116 cells. A) HCT116 cells were pre-treated with TGF-β1-human recombinant protein (20 ng/ml for 48 hours) and the changes in Cten, ROCK1, N-cadherin, E-cadherin, Src, and Snail protein expression were determined by western blot (upper panel). Graph on the lower panel represents the densitometry values calculated for each protein band normalised to actin. B) Treatment of HCT116 cells with TGFβ1 TGF-β1-human recombinant protein (20 ng/ml for 48 hours) induced wound closure compared to untreated control ( $P = 0.0084$ ). C) Stimulation of TGFβ1 was associated with an increase in cell migration compared to untreated HCT116 cells control ( $P = 0.0032$ ). D) Stimulation of SW620 cells with TGFβ1 treatment increased cell invasion compared to untreated control ( $P = 0.0022$ ). E) Stimulation of TGFβ1 in HCT116 cells resulted in an increase in cell proliferation compared to untreated control ( $P \leq 0.0001$ ). Results are representative of at least 3 experimental replicates. \*\*= $P < 0.01$

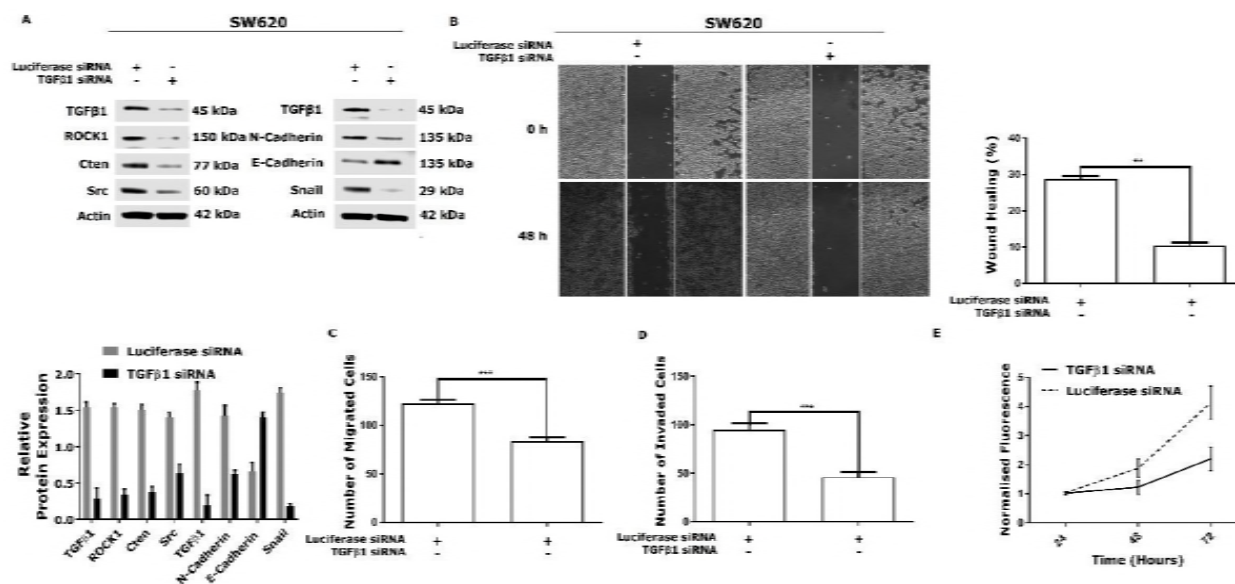

**Figure 3:** TGFβ1 knockdown decreases Cten protein expression in SW620 cells. A) SW620 cells were transfected with TGFβ1 targeting siRNA duplexes (200 nM/ml for 48 hours) and the changes in Cten, ROCK1, N-cadherin, E-cadherin, Src, and Snail protein expression were determined by western blot (upper panel). Graph on the lower panel represents the densitometry values calculated for each protein band normalised to actin. B) Knockdown of TGFβ1 in SW620 decreased wound closure compared to luciferase targeting siRNA control ( $P = 0.0016$ ). C) Knockdown of TGFβ1 was associated with a decrease in cell migration compared to luciferase transfected HCT116 cells control ( $P = 0.0003$ ). D) Knockdown of TGFβ1 in SW620 cells decreased cell invasion compared to luciferase siRNA control ( $P = 0.0005$ ). E) Knockdown of TGFβ1 in SW620 cells resulted in a reduction in cell proliferation compared to luciferase siRNA control ( $P \leq 0.0001$ ). Results are representative of at least 3 experimental replicates. \*\*= $P < 0.01$ , \*\*\*= $P < 0.001$

A

## SW620

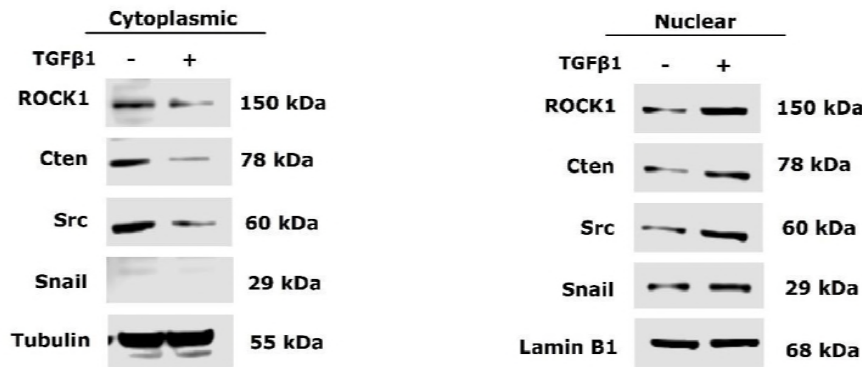

B

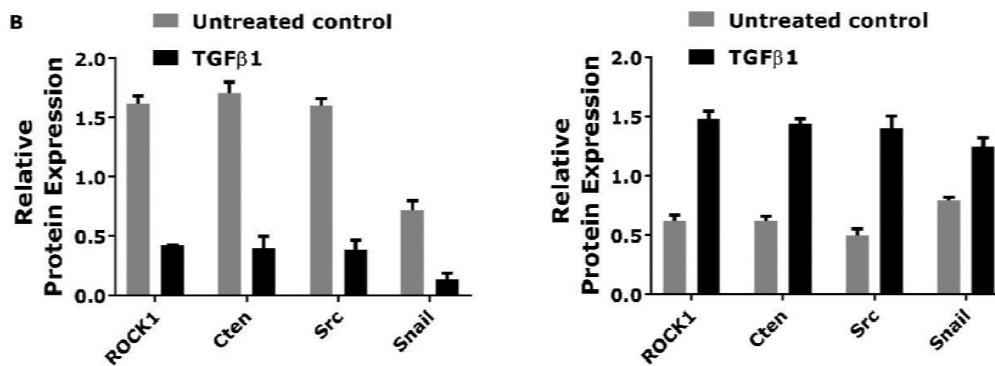

**Figure 4:** TGFβ1 induces nuclear translocation of Cten and its downstream targets in SW620 cells. A) Subcellular fractionation extraction was performed following the treatment of SW620 cell with or without 20 ng/ml of TGF-β1-human recombinant protein for 48 hours and the lysates were assessed by western blot. Lamin B1 and tubulin were used as loading control for cytoplasmic and nuclear fractions. B) Quantitative determination of the relative expression of ROCK1, Cten, Src, and Snail protein fractions following treatment with TGFβ1.

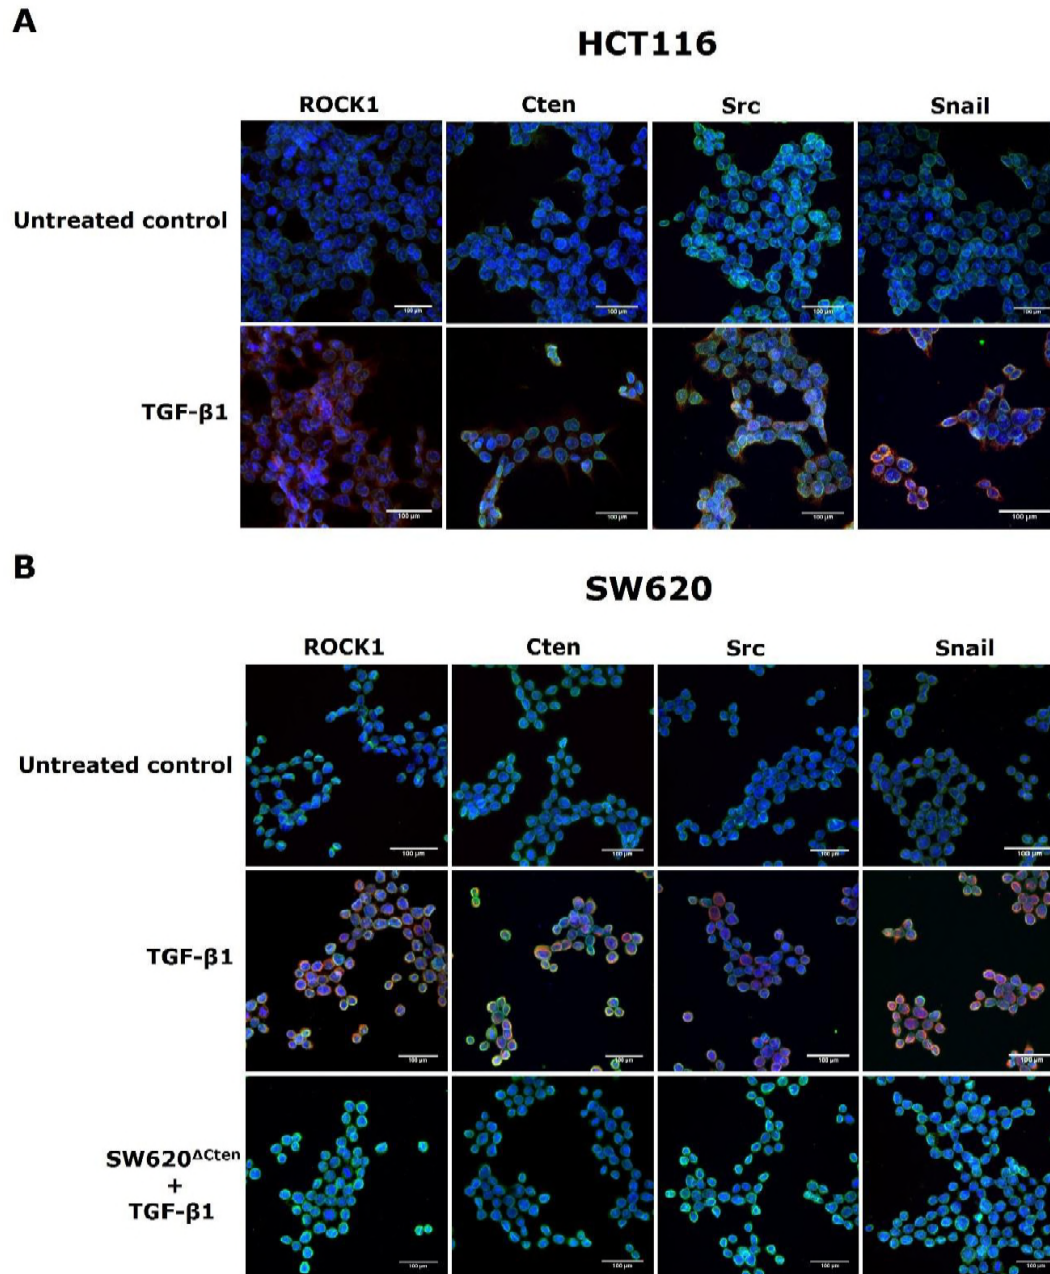

**Figure 5:** TGFβ1 induces nuclear localisation of Cten/Src/ROCK1/Snail. A and B) Stimulation of TGFβ1 increases nuclear localisation and expression of Cten and its downstream targets in HCT116 and SW620 cells but this was lost when Cten was knocked out in SW620<sup>ΔCten</sup> cells. The subcellular localisation of ROCK1, Src, Cten, and Snail was examined by confocal microscopic images of DAPI (blue), nuclear envelope marker Lamin B (green) and ROCK1, Src, Cten or Snail protein (17) in untreated control and treated cells with TGFβ1 stimulation (20ng/ml) for 48 hours. (scale bar 100 μm).

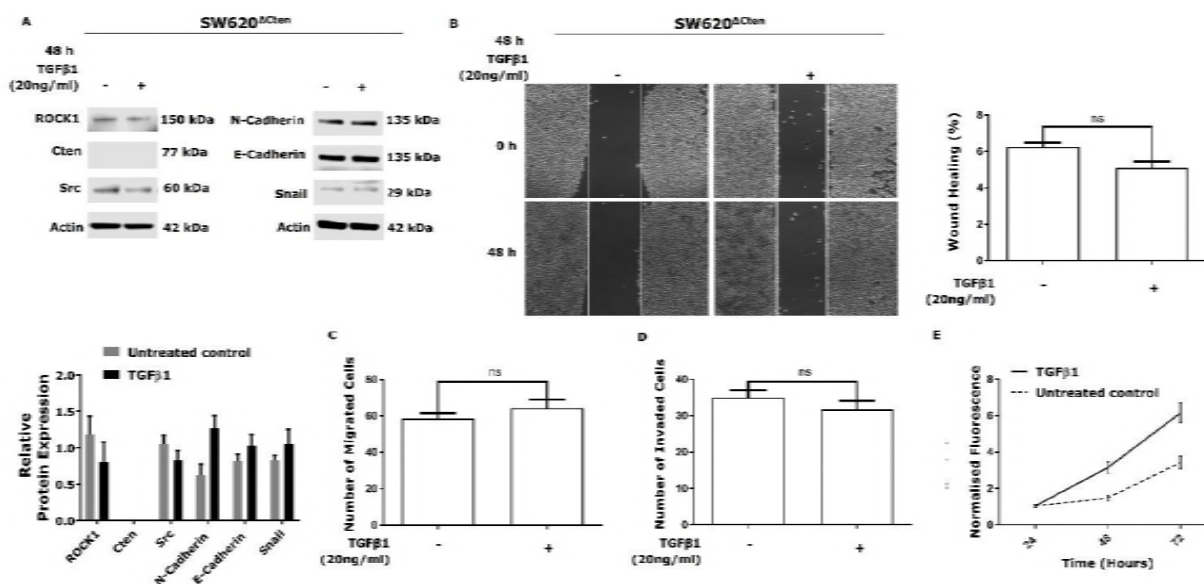

**Figure 6:** TGFβ1 signals through Cten to regulates EMT and promotes cell migration and invasion. A) Stimulation of SW620<sup>ΔCten</sup> cells with TGFβ1 treatment (20 ng/ml for 48 hours) was associated with a small increase in N-cadherin expression and ROCK1, Src, Snail, and E-cadherin protein expression level remained unchanged from the untreated cells control (upper panel). Graph on the lower panel represents the densitometry values calculated for each protein band normalised to actin. B) Wound healing assay showed no significant differences between TGFβ1 stimulation and untreated SW620<sup>ΔCten</sup> cells control (P = 0.0585). C) Stimulation of TGFβ1 in SW620<sup>ΔCten</sup> cells did not cause a significant increase in cell migration compared to untreated control (P = 0.1561). D) Treatment of SW620<sup>ΔCten</sup> cells with TGF-β1-human recombinant protein did not enhance cell invasion compared to untreated control (P = 0.1469). E) Stimulation of TGFβ1 in SW620<sup>ΔCten</sup> cells was associated with an increase in cell proliferation compared to untreated control (P ≤ 0.0001). Results are representative of at least 3 experimental replicates. \*\*=P<0.01





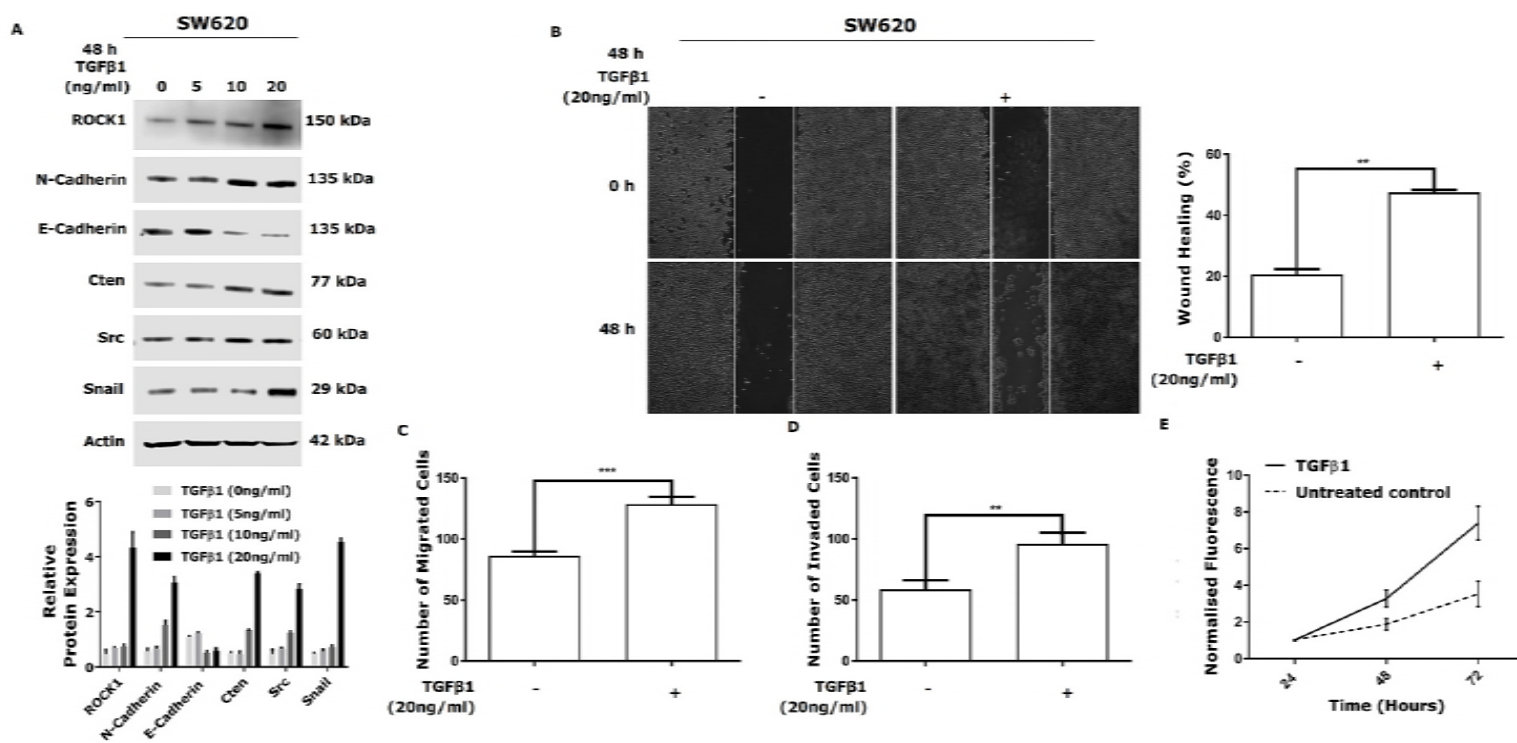

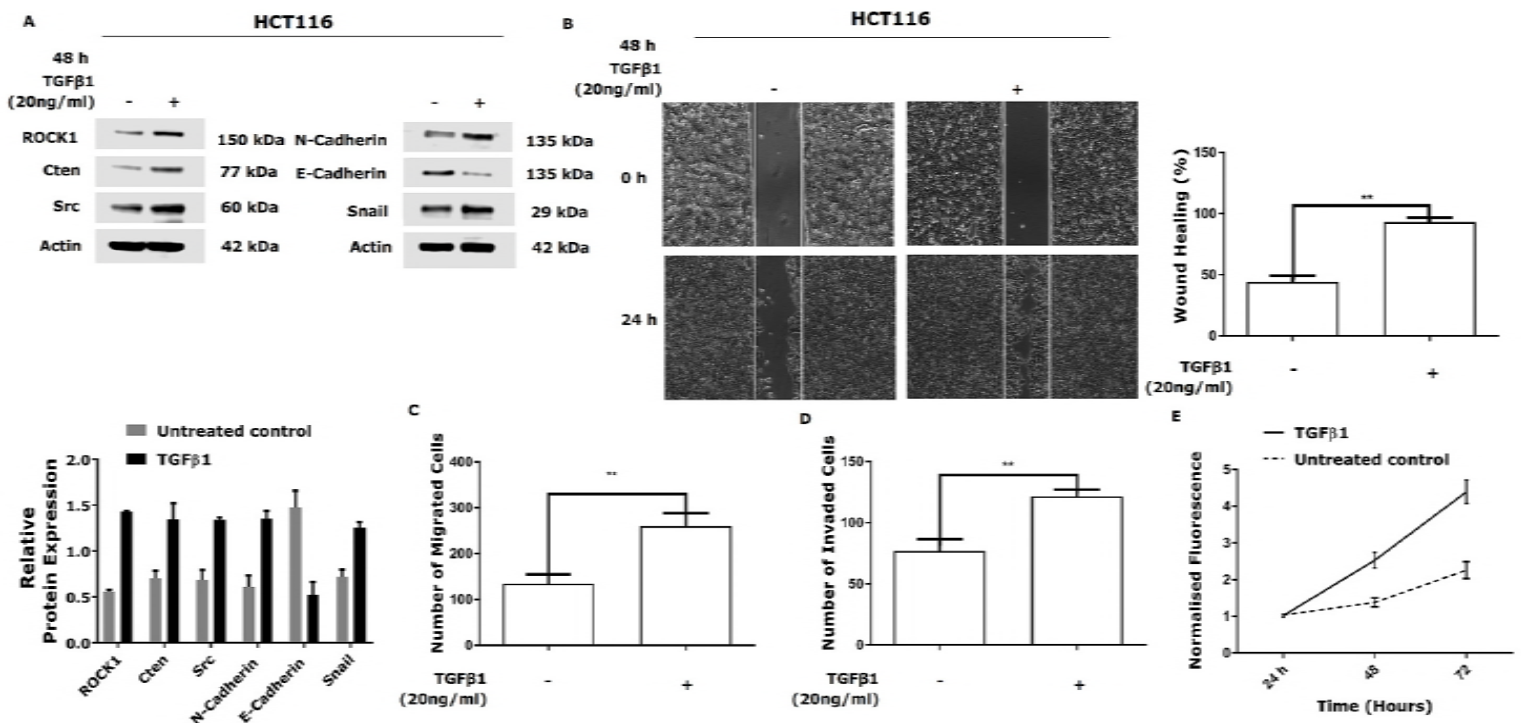

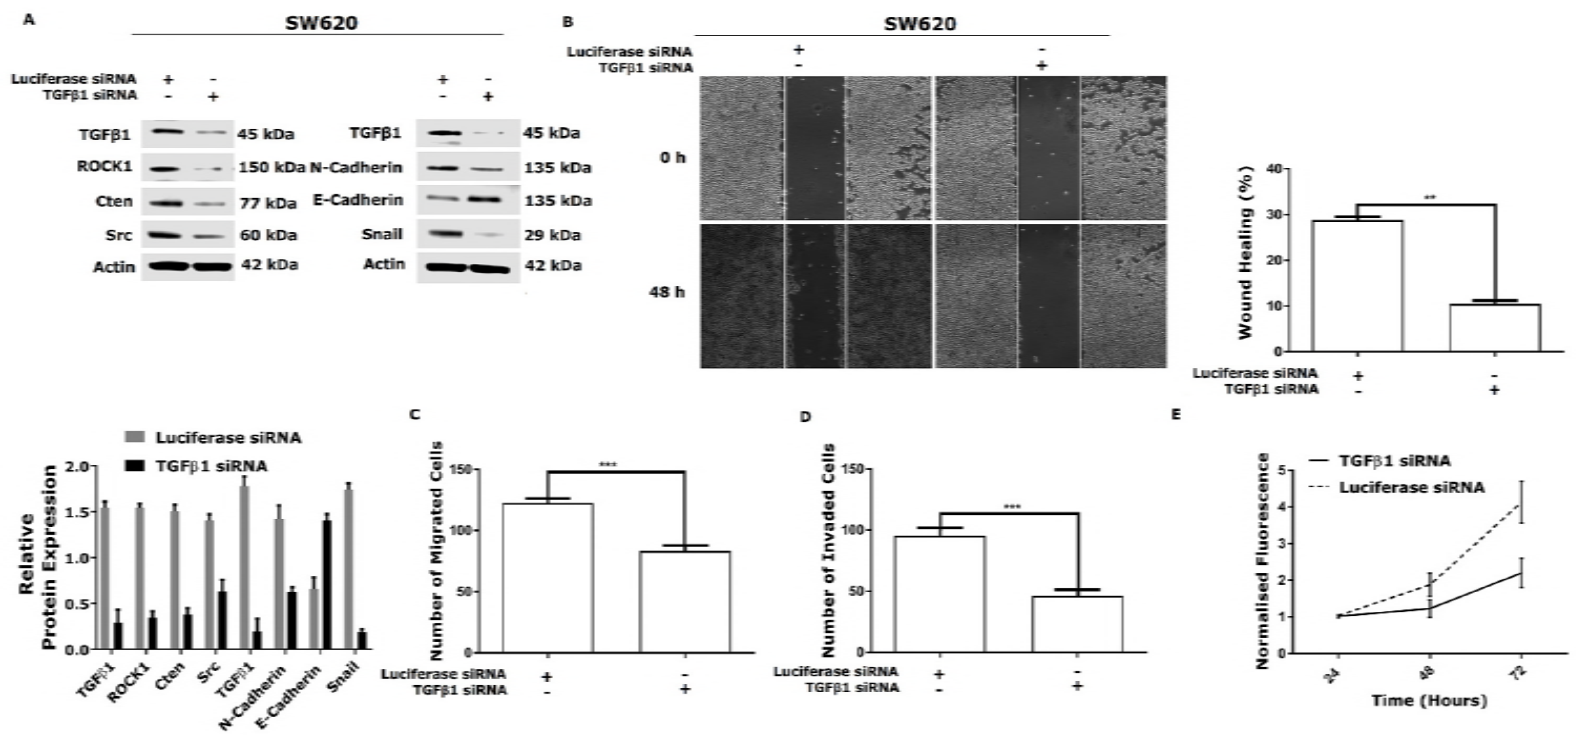

A

## SW620

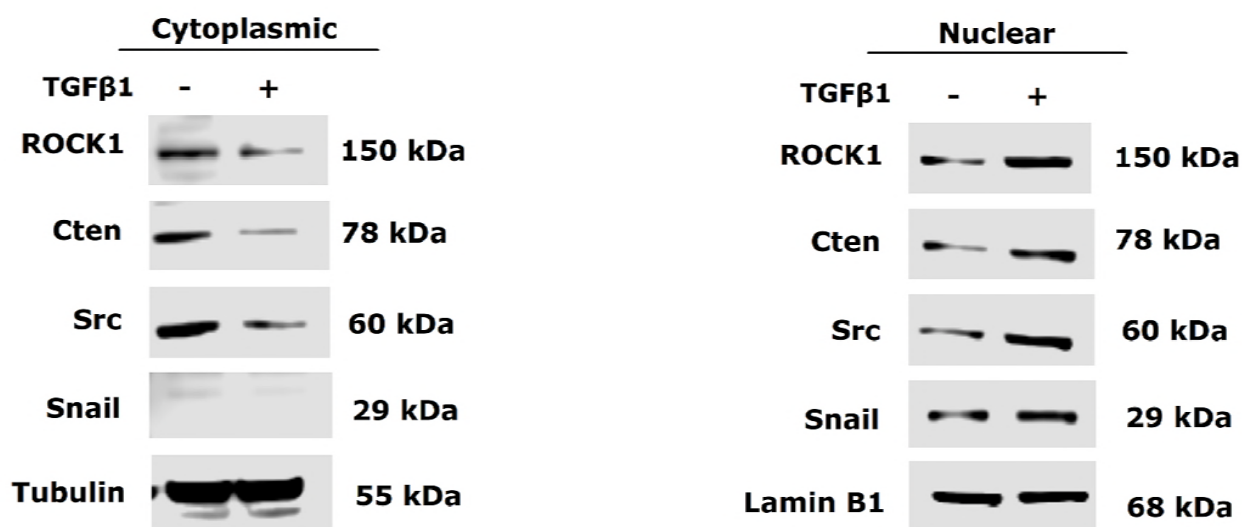

B

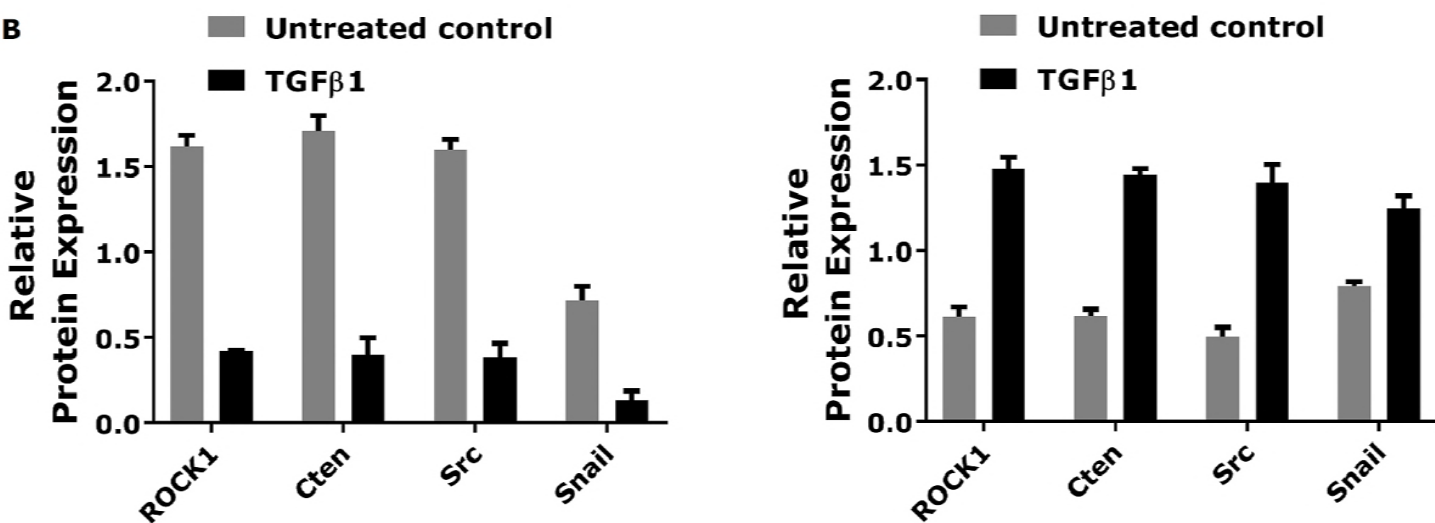

**A**

## HCT116

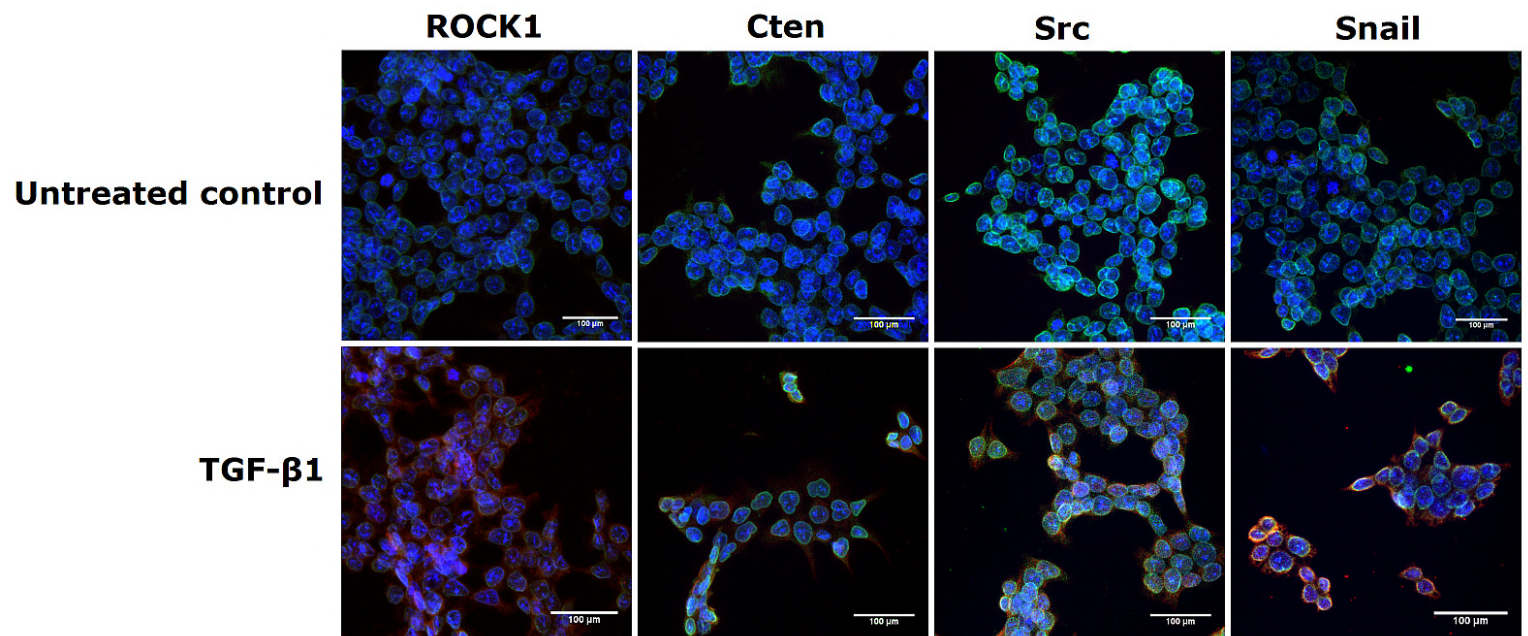

**B**

## SW620

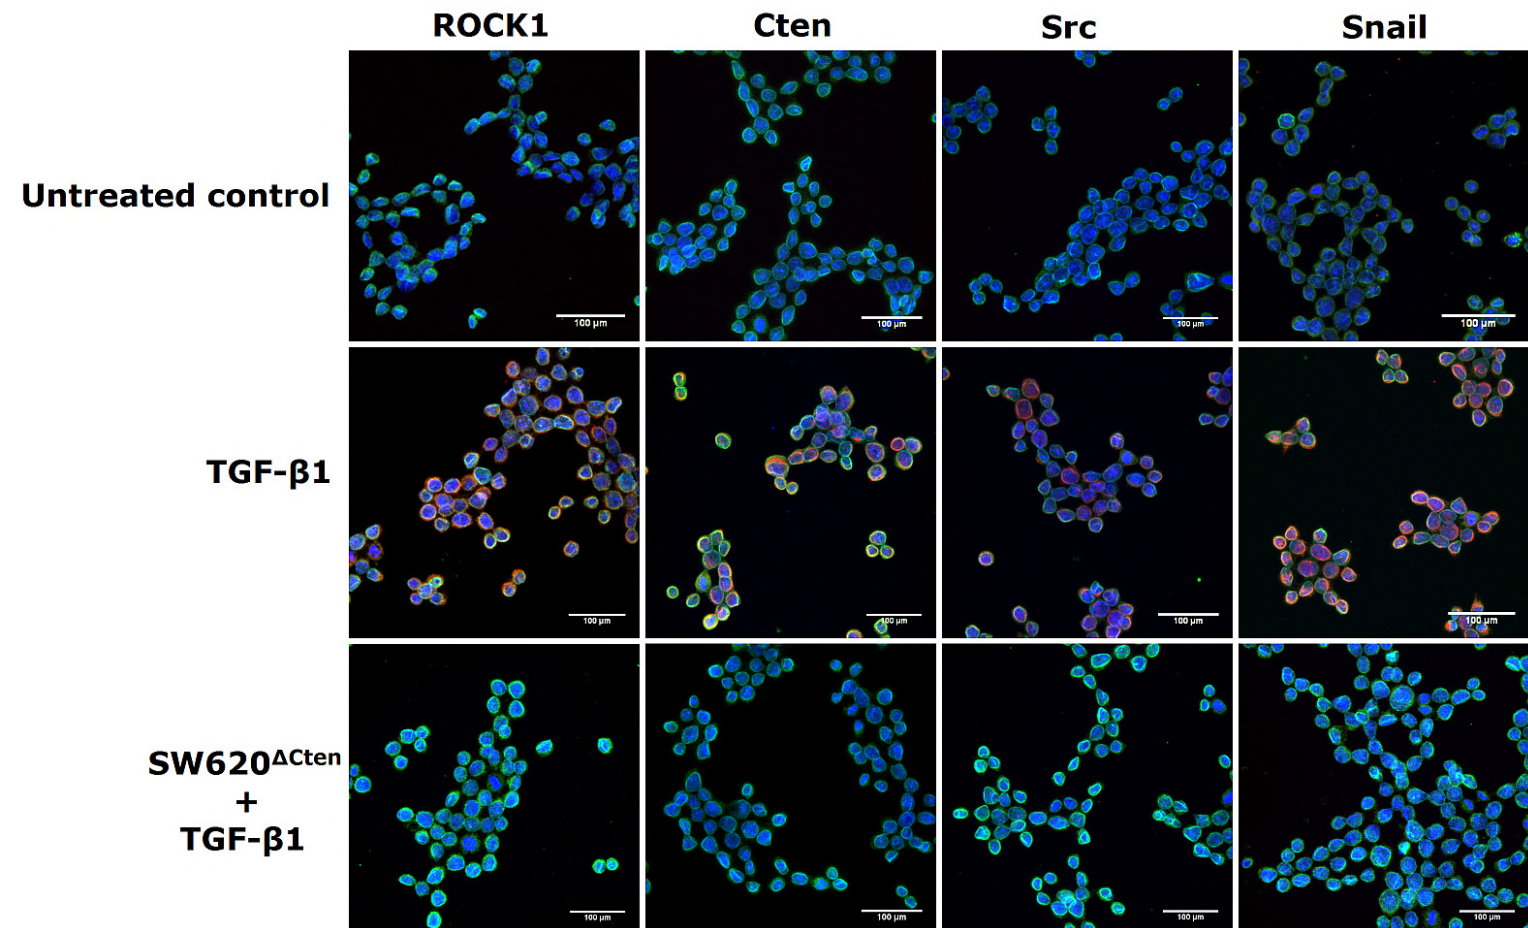

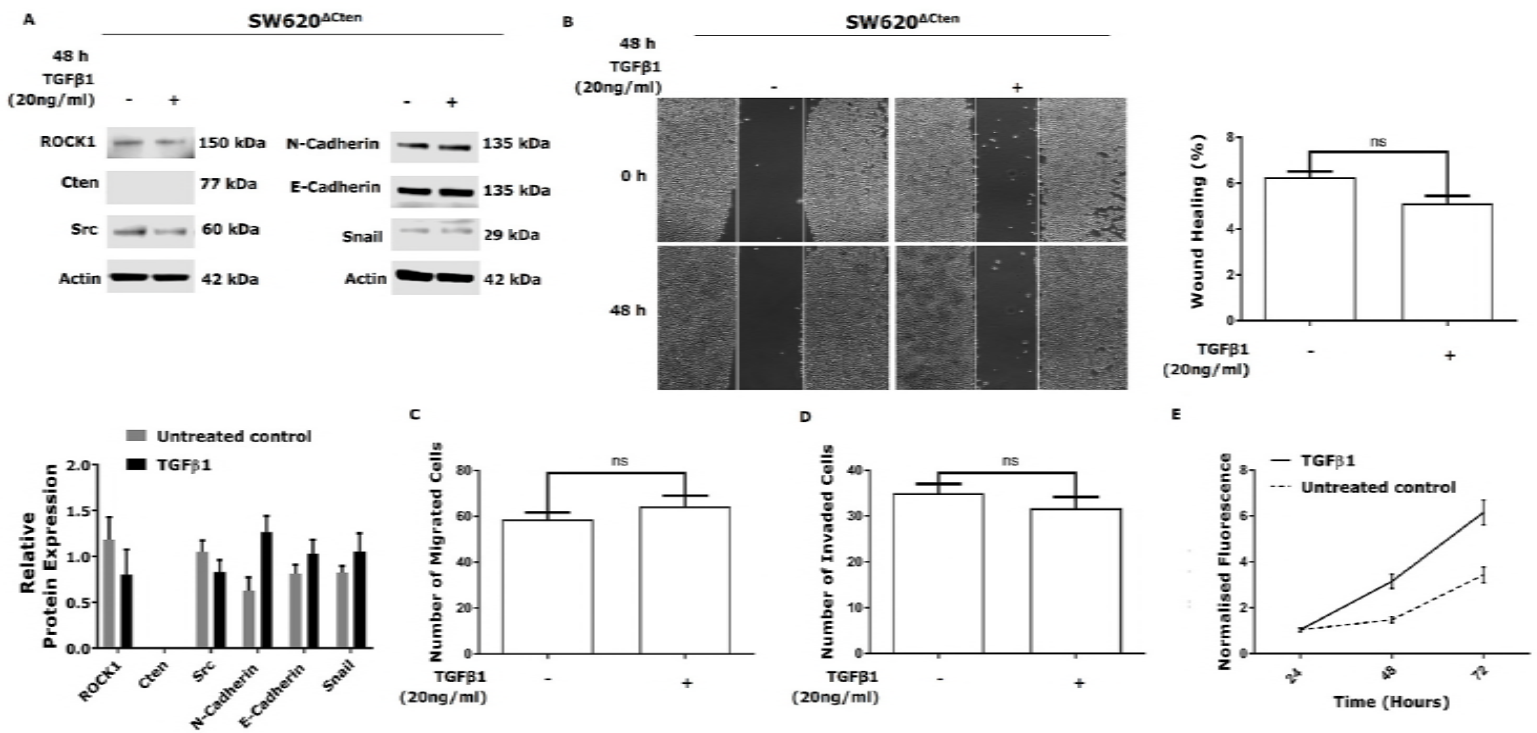

Source: https://www.biorxiv.org/content/10.1101/339341v1.full.pdf
